# Supplementary material for: 2-Hydroxylation of Acinetobacter baumannii Lipid A Contributes to Virulence
Source: PubMed Central journal article supplement (PMC6434125; doi:10.1128/iai.00066-19), 2019-03-25
Supplement: IAI.00066-19-s0001.pdf [file IAI.00066-19-s0001.pdf]

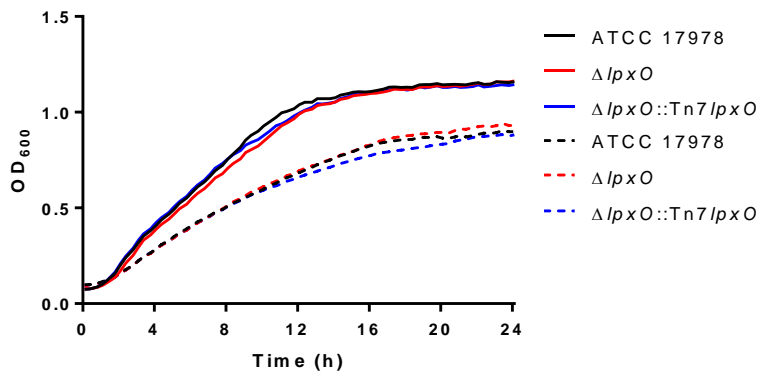

**Supplementary figure 1. Growth kinetics of *A. baumannii* strains.**

Growth kinetics of *A. baumannii* ATCC 17978 (ATCC 17978, black), *A. baumannii*  $\Delta lpxO$  ( $\Delta lpxO$ , red), *A. baumannii*  $\Delta lpxO::Tn7lpxO$  ( $\Delta lpxO::Tn7lpxO$ , blue) cultured in LB broth (LB, solid lines) and M9 minimal medium (dotted lines) over 24 hours at 37°C. Values are presented as the mean  $\pm$  SD of five independent experiments.

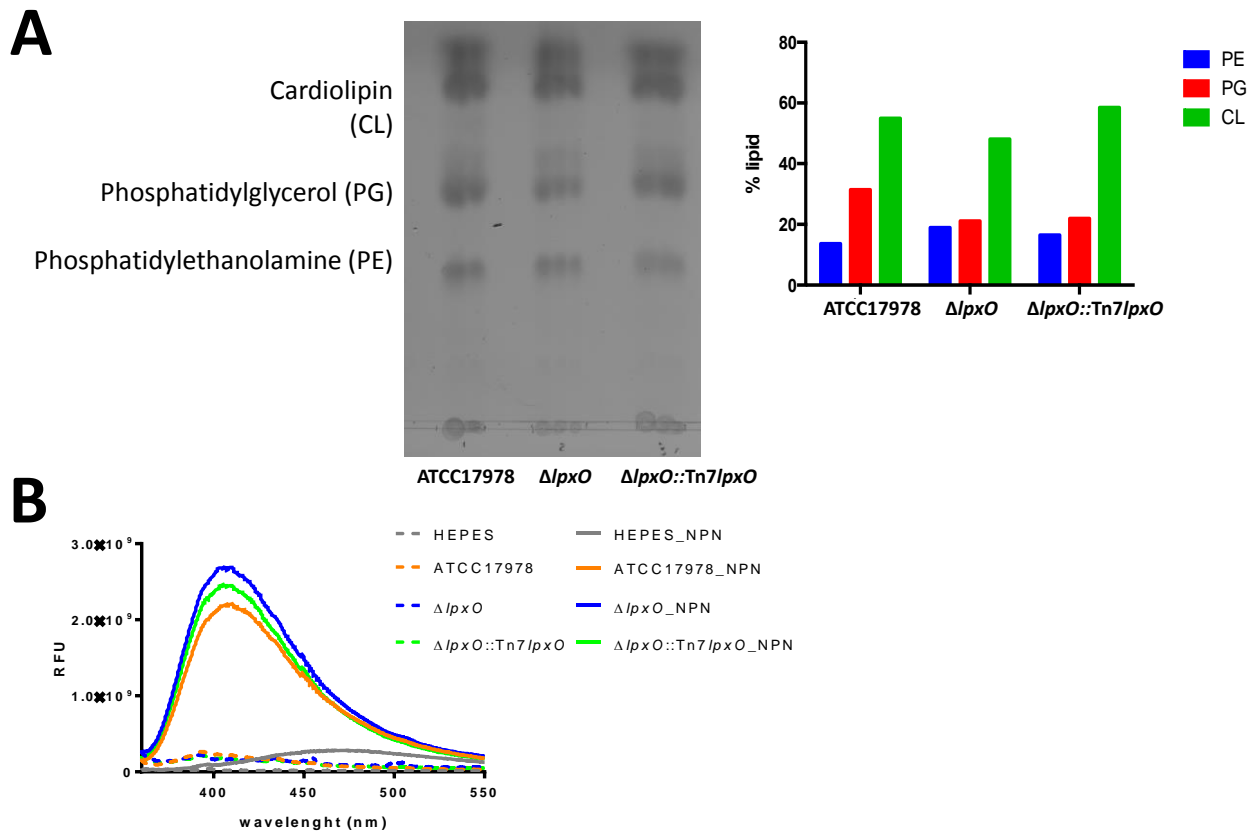

**Supplementary figure 2. *lpxO* deletion in *A. baumannii* does not result in outer membrane alterations.**

(A) Analysis by thin layer chromatography of *A. baumannii* cell envelope phospholipids; right panel shows the percent of a given phospholipid per total lipid content. (B) Partition of the NPN probe in the outer membrane of *A. baumannii* ATCC 17978 (ATCC 17978), *A. baumannii*  $\Delta lpxO$  ( $\Delta lpxO$ ), (D) *A. baumannii*  $\Delta lpxO::Tn7lpxO$  ( $\Delta lpxO::Tn7lpxO$ ). Results are representative of three independent experiments.

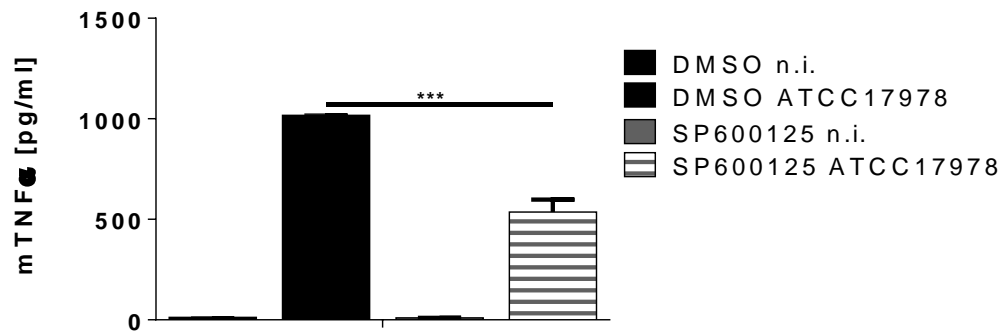

**Supplementary figure 3. JNK controls inflammatory response in *A. baumannii* infected macrophages.**

TNF $\alpha$  secretion upon infection in iBMDM macrophages was analysed in the presence of the MAPK JNK inhibitor (SP600125, 10  $\mu$ M, 2 hours before infection or DMSO [vehicle solution]). Macrophages were stimulated for 5 hours with UV-killed *A. baumannii* ATCC17978 and TNF $\alpha$  levels were determined in the supernatant of infected cells. \*\*\*,  $P < 0.001$ ; for the indicated comparison using the two-way ANOVA with Bonferroni contrasts.

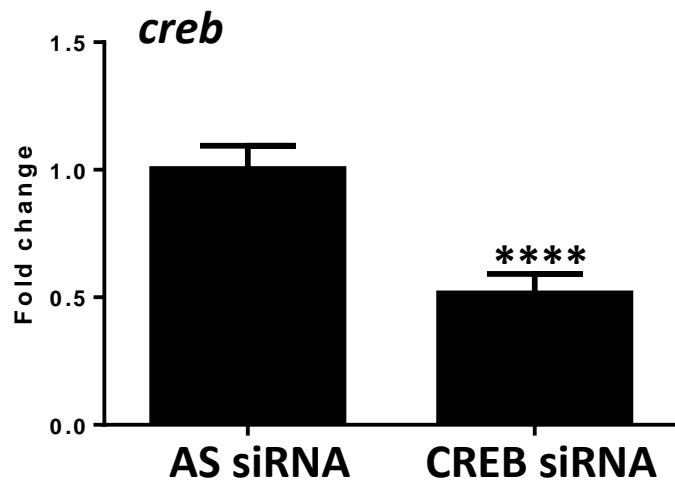

**Supplementary figure 4.** Knockdown efficiency of CREB by siRNA.

Transcript levels of *creb* relative to AllStars control siRNA-transfected cells as determined by RT-qPCR after gene normalization. Values are presented as the mean  $\pm$  SD of three independent experiments measured in duplicate. \*\*\*\* $P < 0.0001$  one-tailed *t* test.
