# Supplementary material for: 2-Hydroxylation of Acinetobacter baumannii Lipid A Contributes to Virulence
Source: PubMed Central journal article supplement (PMC6434125; doi:10.1128/iai.00066-19), 2019-03-25
Supplement: IAI.00066-19-s0002.pdf [file IAI.00066-19-s0002.pdf]

**Table S1.** Primers used in this study.

| Method and target gene           | Primer                                                  | Sequence (5'–3')                                                                       |
|----------------------------------|---------------------------------------------------------|----------------------------------------------------------------------------------------|
| Mutagenesis and complementations |                                                         |                                                                                        |
| <i>A. baumannii</i>              |                                                         |                                                                                        |
| <i>lpxO</i>                      | Ab_lpxO_UP_F1                                           | GTA CAG CTC CGG TAC ACA TTT A                                                          |
|                                  | Ab_lpxO_DWN_F1(BamHI)                                   | <sup>1</sup> <u>GGA TCC</u> TGG TTC CTC ATG CTT GGA AT                                 |
|                                  | Ab_lpxO_UP_R1(BamHI)                                    | <sup>1</sup> <u>GGA TCC</u> TAG GGT TGA TTC GGT ACC TTT G                              |
|                                  | Ab_lpxO_DWN_R1                                          | ATA GGA AAC TAG CCC GAC AAA G                                                          |
|                                  | KpnLpxL1ComF                                            | GCC GGT TAA AAA GCA GCC AA                                                             |
|                                  | KpnLpxL1ComR                                            | AGG AAA TAA ACG GCG GGC AT                                                             |
| Tn7 insertion                    | Ab_glmS_F1<br>Tn7_Right                                 | TTT GCT GAT GAA AAT AGC GG<br>CAC AGC ATA ACT GGA CTG ATT TC                           |
| <i>E. coli</i>                   |                                                         |                                                                                        |
| Tn7 insertion                    | E.coli_glmS_Up<br>E.coli_glmS_Down<br>EcoliLpxL_check_F | TCG ACT GGG CGT ACA AAA CC<br>CGG GAA ACC ATA CCG GAG TT<br>GCA CAC TAA TTA TGC GCC CG |
|                                  | E.coli_pTN7L_F1<br>E.coli_pTN7R_R1                      | ATT AGC TTA CGA CGC TAC ACC C<br>CAC AGC ATA ACT GGA CTG ATT TC                        |
| qPCR                             |                                                         |                                                                                        |
| <i>hprt</i>                      | mHPRT-F1                                                | GAT CAG TCA ACG GGG GAC AT                                                             |
|                                  | mHPRT-R1                                                | GGT CCT TTT CAC CAG CAA GC                                                             |
| <i>tnfα</i>                      | mTNF-α-F1                                               | TTC TGT CTA CTG AAC TTC GGG GTG ATC GGT CC                                             |
|                                  | mTNF-α-R1                                               | GTA TGA GAT AGC AAA TCG GCT GAC GGT GTG GG                                             |
| <i>il10</i>                      | mIL-10_F1                                               | GGA CTT TAA GGG TTA CTT GGG TTG CC                                                     |
|                                  | mIL-10_R1                                               | CAT GTA TGC TTC TAT GCA GTT GAT GA                                                     |
| <i>creb</i>                      | mCREB1_F1                                               | TAA CAG TGC CAA CCC CCA TTT                                                            |
|                                  | mCREB1_R1                                               | CCT GTA CCC CAT CCG TAC CA                                                             |
| <i>18S</i>                       | Galleria_18S_F1                                         | ATG GTT GCA AAG CTG AAA CT                                                             |
|                                  | Galleria_18S_R1                                         | TCC CGT GTT GAG TCA AAT TA                                                             |
| <i>lysozyme</i>                  | Gall_Lysozyme_F1                                        | TCC CAA CTC TTG ACC GAC GA                                                             |
|                                  | Gall_Lysozyme_R1                                        | AGT GGT TGC GCC ATC CAT AC                                                             |
| <i>galiomycin</i>                | Galiomycin_F1                                           | CCT CTG ATT GCA ATG CTG AGT G                                                          |
|                                  | Galiomycin_R1                                           | GCT GCC AAG TTA GTC AAC AGG                                                            |
| <i>gallerimycin</i>              | Gallerimycin_F1                                         | CGC AAT ATC ATT GGC CTT CT                                                             |
|                                  | Gallerimycin_R1                                         | CCT GCA GTT AGC AAT GCA CTC                                                            |

<sup>1</sup> BamHI site underlined.
